# Supplementary material for: Preparation and characterization of functionalized nickel ferrite nanoparticles with thioether used as a solid acid nanocatalyst for the synthesis of 2-aryl benzimidazoles
Source: Royal Society of Chemistry journal article supplement (doi:10.1039/d4nj02431a), 2024-01-01
Supplement: d4nj02431a1.pdf [file d4nj02431a1.pdf]

## Supporting information

### Preparation and characterization of functionalized nickel ferrite nanoparticles with thioether and using as solid acid nanocatalyst for the synthesis of 2-aryl benzimidazoles

Atieh Eslami, Hossein Naeimi\*

*Department of Organic Chemistry, Faculty of Chemistry, University of Kashan, Kashan, 87317-51167, I.R. Iran; Tel: 98-31-55912388; Fax: 983155912397; E-mail: [Naeimi@kashanu.ac.ir](mailto:Naeimi@kashanu.ac.ir)*

#### Table of Contents

|                                                                               |    |
|-------------------------------------------------------------------------------|----|
| General procedure for the synthesis of 2-aryl substituted benzimidazoles..... | 2  |
| 2-Phenyl-1H-benzimidazole (4a).....                                           | 2  |
| 2-(2-Nitrophenyl)-1H-benzimidazole (4b) .....                                 | 3  |
| 2-(4-Nitrophenyl)-1H-benzimidazole (4c).....                                  | 4  |
| 2-(2-Methylphenyl)-1H-benzimidazole (4d).....                                 | 5  |
| 2-(4-Chlorophenyl)-1H-benzimidazole (4e).....                                 | 6  |
| 2-(3-Hydroxyphenyl)-1H-benzimidazole (4f).....                                | 7  |
| 2-(2-Hydroxyphenyl)benzimidazole (4g).....                                    | 8  |
| 2-(P-tolyl)-1H-benzimidazole (4h).....                                        | 9  |
| 2-(4-Methoxyphenyl)-1H-benzimidazole (4i).....                                | 10 |
| 2-(5-Bromo-2-hydroxyphenyl)-1H-benzimidazole (4j).....                        | 11 |
| 2-(3-Chlorophenyl)-1H-benzimidazole (4k).....                                 | 12 |
| 2-(4-Bromo-phenyl)-benzimidazole (4l).....                                    | 13 |

## General procedure for the synthesis of 2-aryl substituted benzimidazoles

This process involved mixing aromatic aldehyde (1 mmol), *o*-phenylenediamine 0.1 g (1 mmol), solid iodine 0.06 g (2.4 mmol), and NiFe<sub>2</sub>O<sub>4</sub>@SiO<sub>2</sub>-Pr-S-nBu-SO<sub>3</sub>H catalyst (20 mg) in acetonitrile in a 50 mL round bottom flask until well combined. The reaction flask was placed on a stirrer at room temperature for an appropriate time. Thin-layer chromatography (TLC) was used to monitor the advancement of the reaction. Once the reaction was finished, the resulting product was separated by filtration and washed several times with cold methanol. Pure benzimidazole was obtained through a recrystallization process using methanol. Synthesized compounds were determined with melting point, FT-IR, and <sup>1</sup>H NMR analyses.

### FT-IR and <sup>1</sup>H NMR Spectra of synthesized 2-aryl benzimidazoles derivatives:

**2-Phenyl-1H-benzimidazole (4a)**; Yellow solid; M.P.: 289-290 °C (lit. m.p.: 290-292 °C); IR (KBr,  $\nu$ , cm<sup>-1</sup>): 3432, 1612, 1437, 1498, 3075, 1252; <sup>1</sup>H NMR (400 MHz, DMSO-*d*<sub>6</sub>)  $\delta$  (ppm): 7.48 (t, *J* = 7.6 Hz, 1H, Ar), 7.54-7.60 (m, 4H, Ar), 8.07-8.17 (m, 4H, Ar).

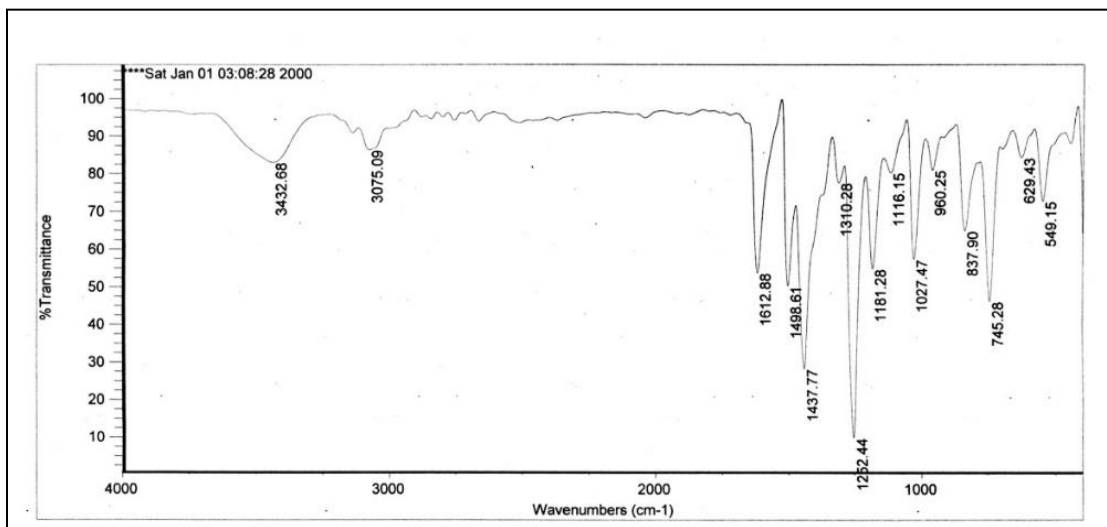

Figure 1S. The FT-IR spectrum

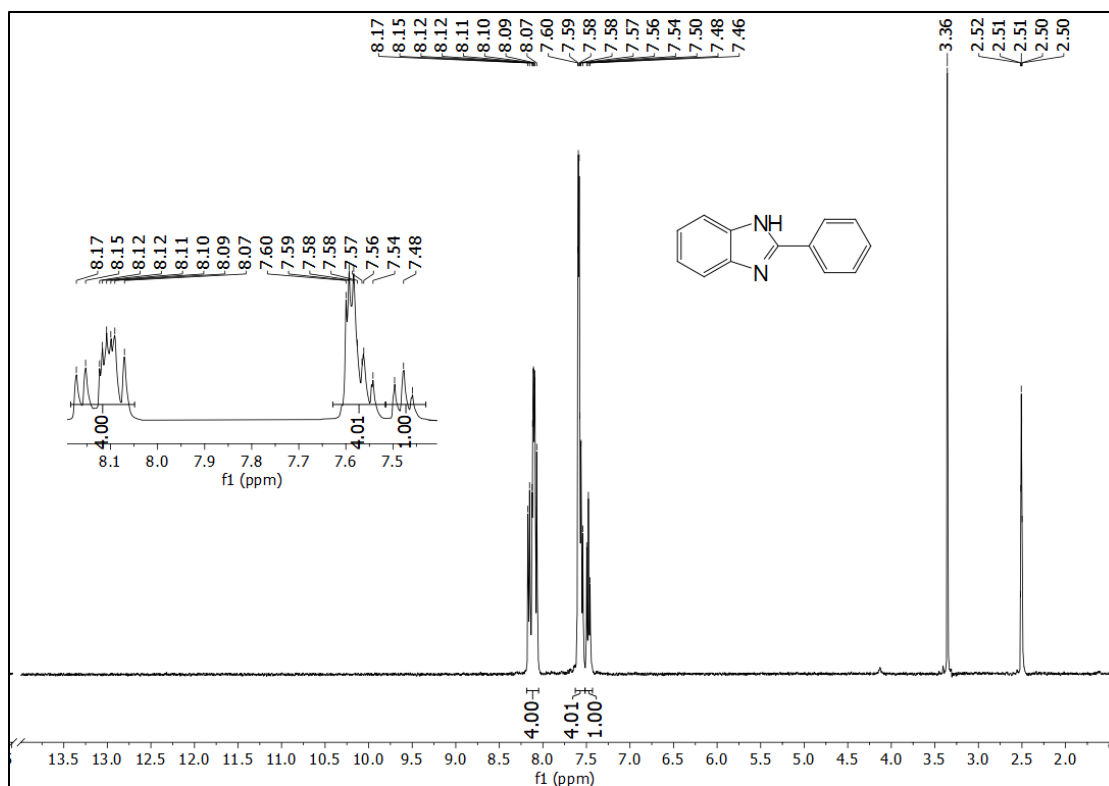

Figure 2S. The <sup>1</sup>H NMR spectrum

**2-(2-Nitrophenyl)-1H-benzimidazole (4b):** Yellow solid; 260-263 °C (lit. m.p.: 265-267 °C); IR (KBr,  $\nu$ ,  $\text{cm}^{-1}$ ): 3438, 1603, 1530, 1437, 2917, 1337; <sup>1</sup>H NMR (400 MHz, DMSO-*d*<sub>6</sub>)  $\delta$  (ppm): 7.53 (s, 2H, Ar), 7.85 (s, 2H, Ar), 7.99 (q,  $J = 7.9$  Hz, 1H, Ar), 8.47-8.61 (m, 2H, Ar), 9.06 (d,  $J = 7.7$  Hz, 1H, Ar).

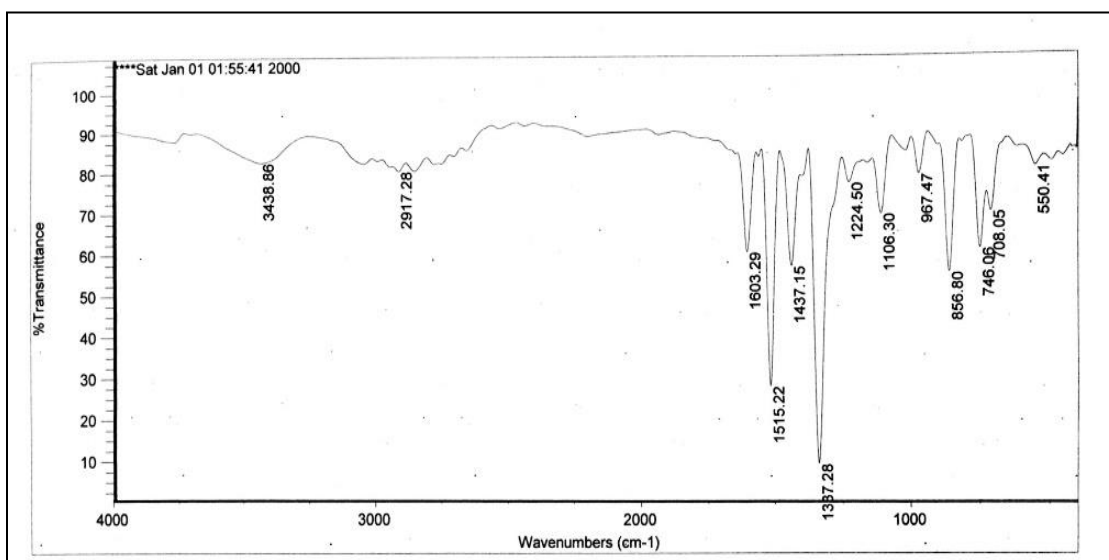

Figure 3S. The FT-IR spectrum

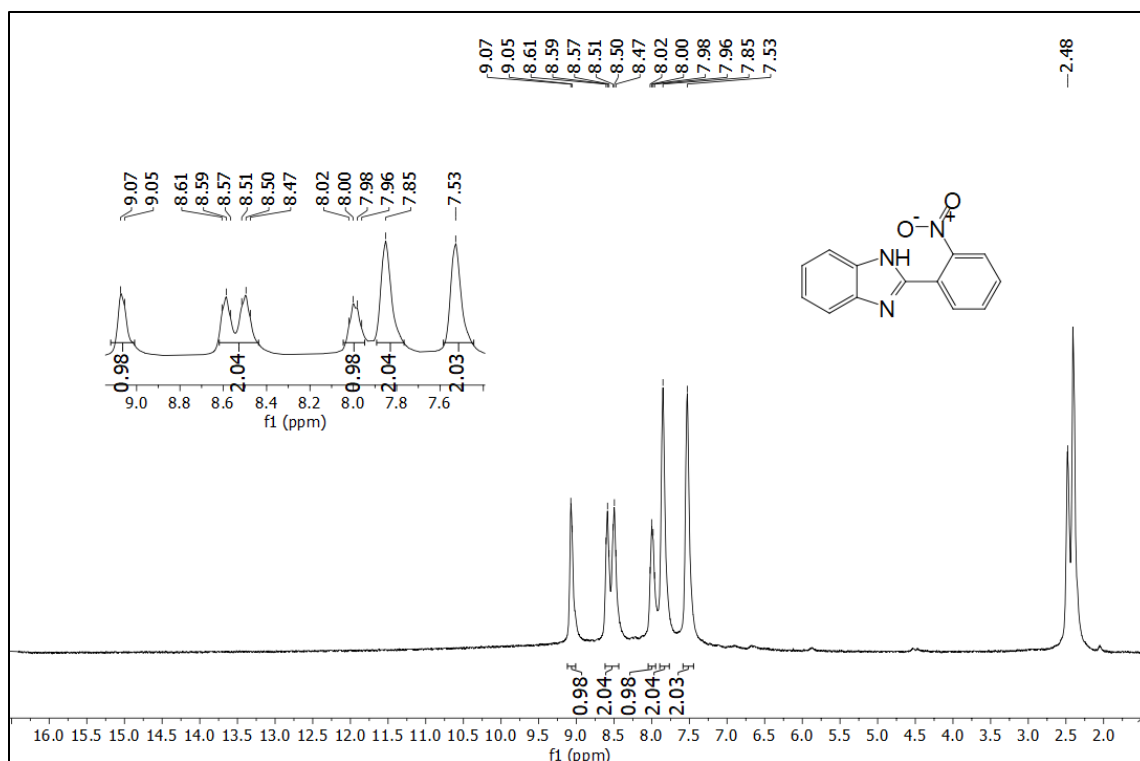

Figure 4S. The  $^1\text{H}$  NMR spectrum

**2-(4-Nitrophenyl)-1H-benzimidazole (4c)**; Yellow solid; M.P.: 307-309 °C (lit. m.p.: 310-312 °C); IR (KBr,  $\nu$ ,  $\text{cm}^{-1}$ ): 3297, 1606, 1546, 1492, 1324;  $^1\text{H}$  NMR (400 MHz,  $\text{DMSO-}d_6$ )  $\delta$  (ppm): 7.29 (dt,  $J = 7.1, 3.6$  Hz, 2H, Ar), 7.68 (dt,  $J = 6.9, 3.6$  Hz, 2H, Ar), 8.43 (s, 4H, Ar).

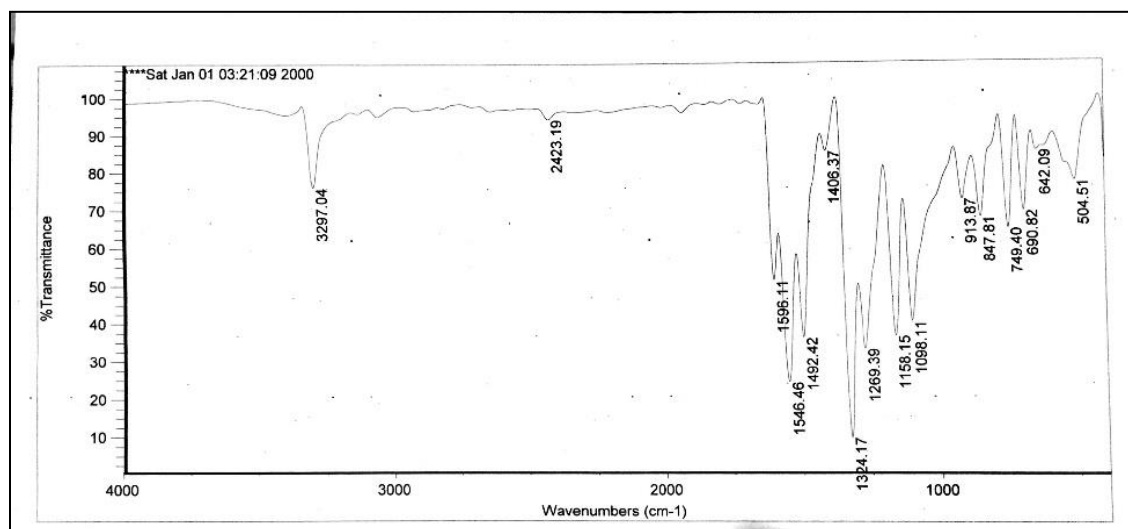

Figure 5S. The FT-IR spectrum

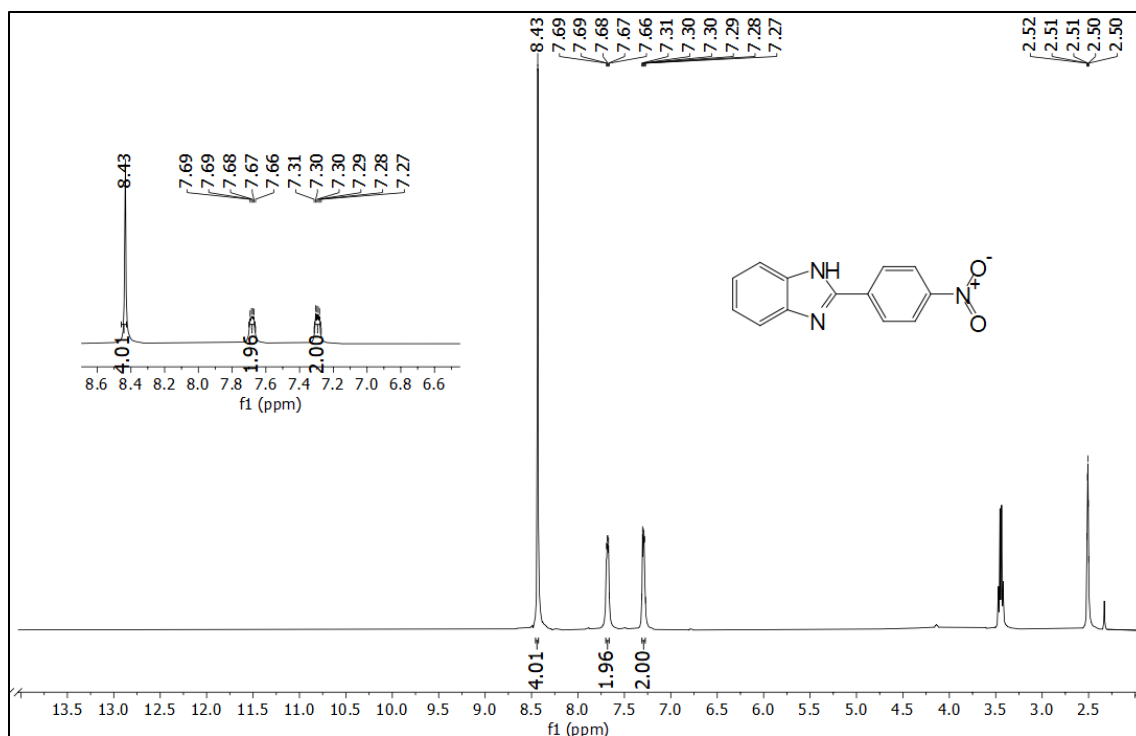

Figure 6S. The <sup>1</sup>H NMR spectrum

**2-(2-Methylphenyl)-1H-benzimidazole (4d)**; Yellow solid; M.P.: 215-218 °C (lit. m.p.: 220-222 °C); IR (KBr,  $\nu$ ,  $\text{cm}^{-1}$ ): 3049, 1624, 1447, 1403, 2969, 1360; <sup>1</sup>H NMR (400 MHz, DMSO-*d*<sub>6</sub>)  $\delta$  (ppm): 2.41 (s, 3H, Me), 7.19 (dd,  $J = 6.2, 3.2$  Hz, 2H, Ar), 7.30 (d,  $J = 7.5$  Hz, 1H, Ar), 7.43 (t,  $J = 7.6$  Hz, 1H, Ar), 7.58 (s, 2H, Ar), 7.96 (d,  $J = 7.6$  Hz, 1H, Ar) 8.02 (s, 1H, Ar), 12.85 (s, 1H, Ar).

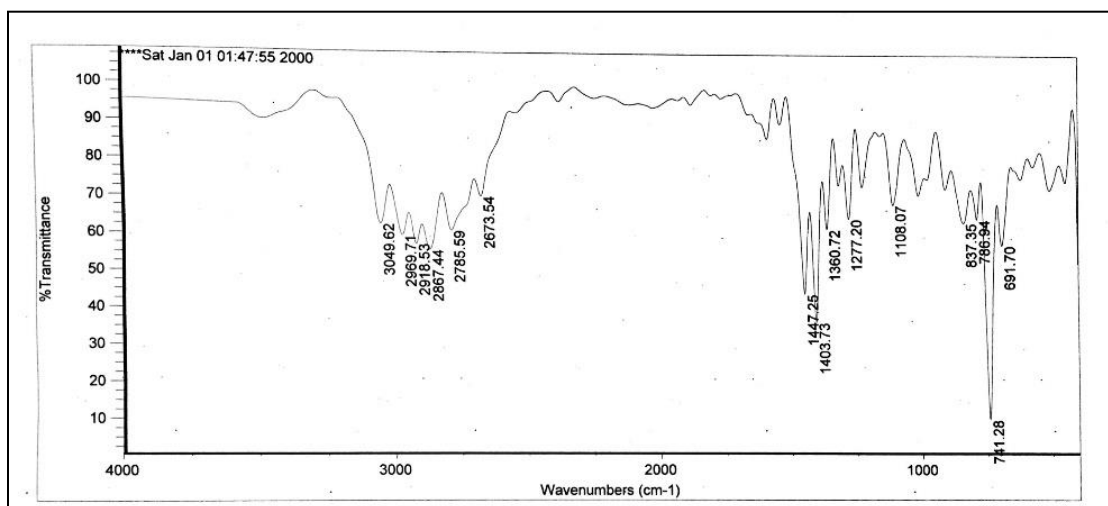

Figure 7S. The FT-IR spectrum

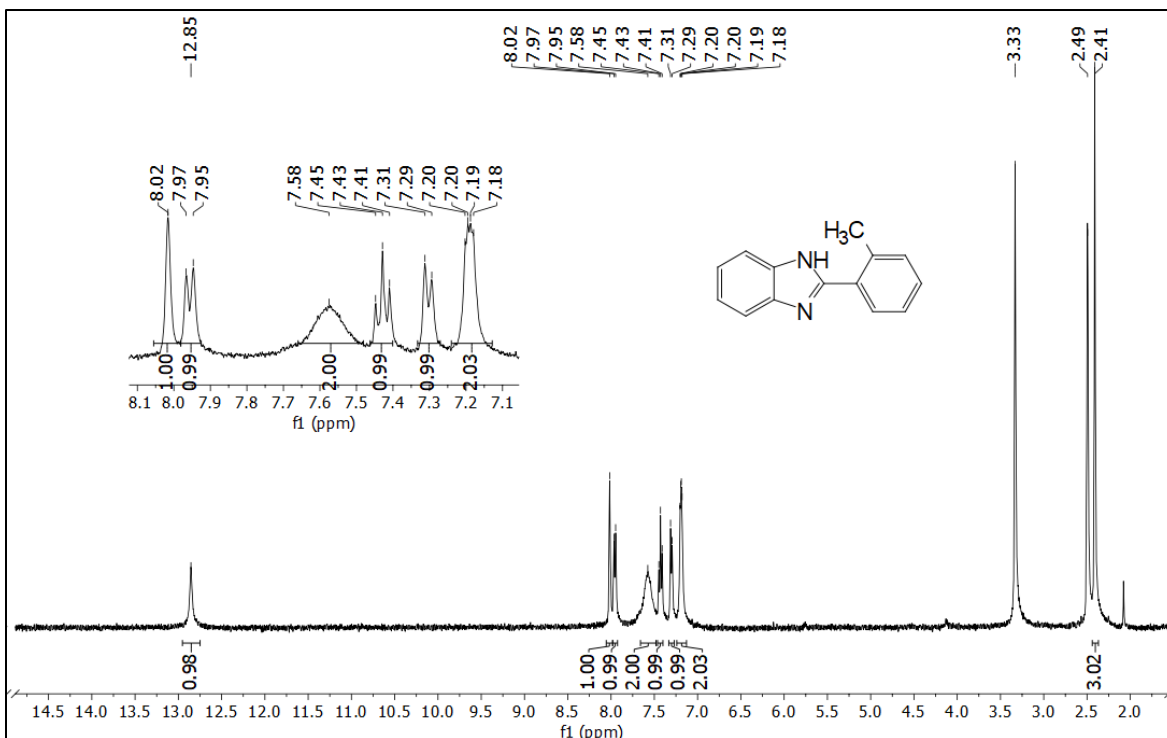

Figure 8S. The <sup>1</sup>H NMR spectrum

**2-(4-Chlorophenyl)-1H-benzimidazole (4e)**; Yellow solid; M.P.: 287-290 °C (lit. m.p.: 292-294 °C); IR (KBr,  $\nu$ ,  $\text{cm}^{-1}$ ): 3404, 1597, 1489, 1431, 3053, 1272; <sup>1</sup>H NMR (400 MHz, DMSO-*d*<sub>6</sub>)  $\delta$  (ppm): 7.16-7.29 (m, 2H, Ar), 7.49-7.56 (m, 1H, Ar), 7.61-7.71 (m, 3H, Ar), 8.19 (d,  $J = 8.6$  Hz, 2H, Ar), 13 (s, 1H, NH).

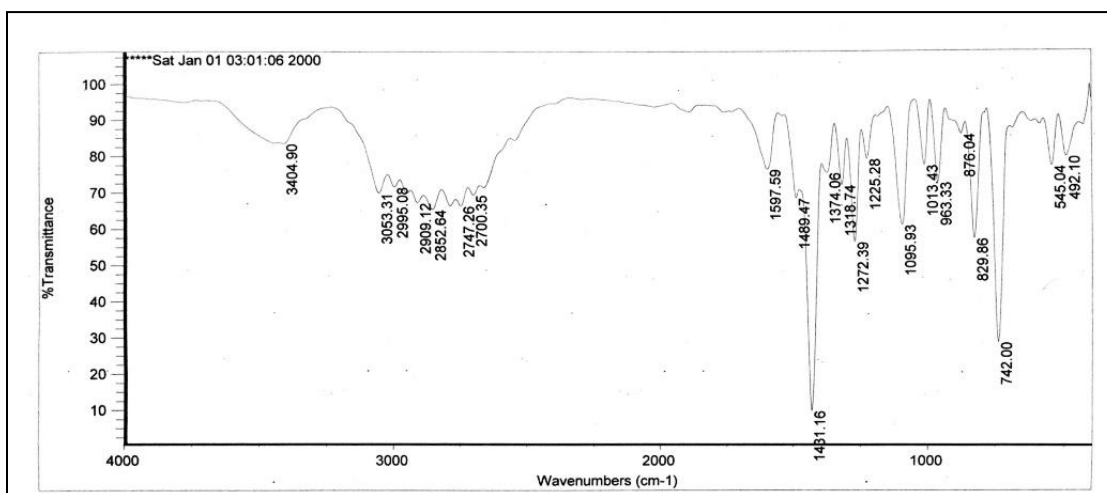

Figure 9S. The FT-IR spectrum

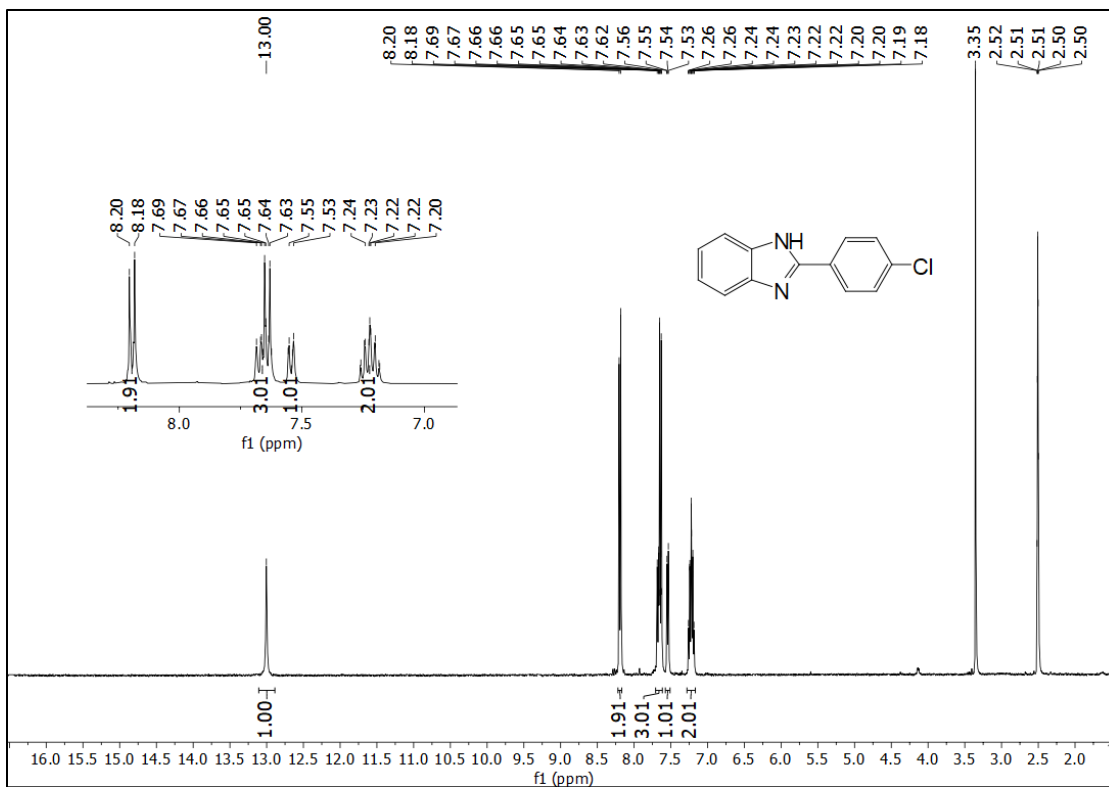

Figure 10S. The <sup>1</sup>H NMR spectrum

**2-(3-Hydroxyphenyl)-1H-benzimidazole (4f)**; Yellow solid; M.P.: 250-252 °C (lit. m.p.: 245-247 °C); IR (KBr,  $\nu$ ,  $\text{cm}^{-1}$ ): 3282, 1592, 1445, 1432, 2905, 1228; <sup>1</sup>H NMR (400 MHz, DMSO-*d*<sub>6</sub>)  $\delta$  (ppm): 6.88-6.91 (m, 1H, Ar), 7.18-7.22 (m, 2H, Ar), 7.34 (t,  $J = 7.8$  Hz, 1H, Ar), 7.57-7.61 (m, 4H, Ar), 9.74 (s, 1H, O-H), 12.84 (s, 1H, NH).

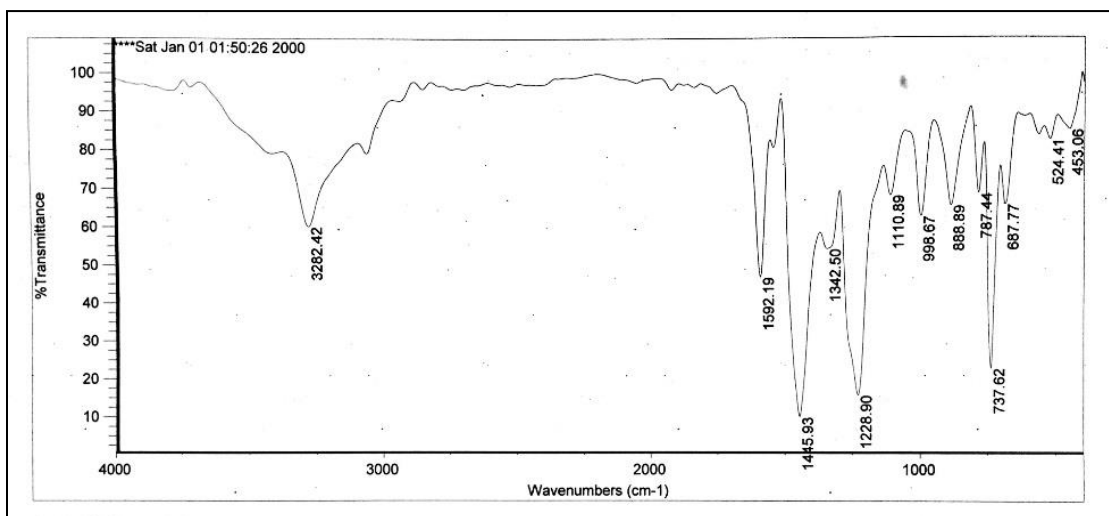

Figure 11S. The FT-IR spectrum

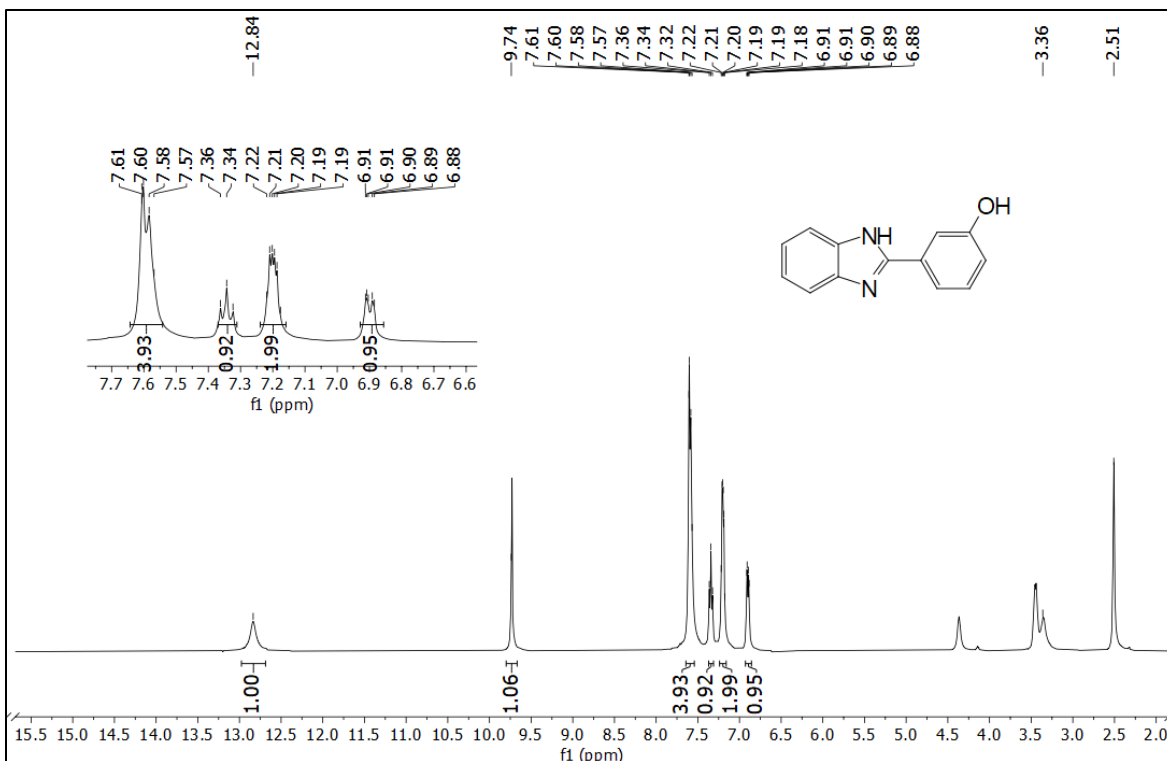

Figure 12S. The <sup>1</sup>H NMR spectrum

**2-(2-Hydroxyphenyl)benzimidazole (4g)**; White solid; M.P.: 250-252 °C (lit. m.p.: 242-244 °C); IR (KBr,  $\nu$ ,  $\text{cm}^{-1}$ ): 3245, 1592, 1533, 1489, 1264; <sup>1</sup>H NMR (400 MHz, DMSO-*d*<sub>6</sub>)  $\delta$  (ppm): 7.01-7.05 (m, 2H, Ar), 7.28-7-7.31 (m, 2H, Ar), 7.39 (t,  $J = 7.8$  Hz, 1H, Ar), 7.64-7.68 (m, 2H, Ar), 8.06 (d,  $J = 7.8$  Hz, 1H, Ar), 13.20 (s, 1H, O-H), 13.20 (s, 1H, N-H).

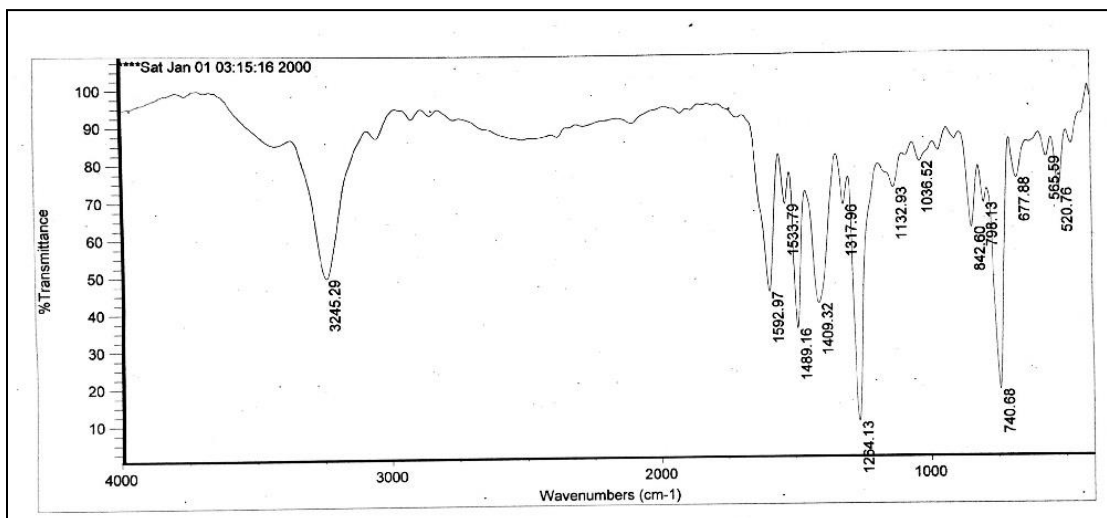

Figure 13S. The FT-IR spectrum



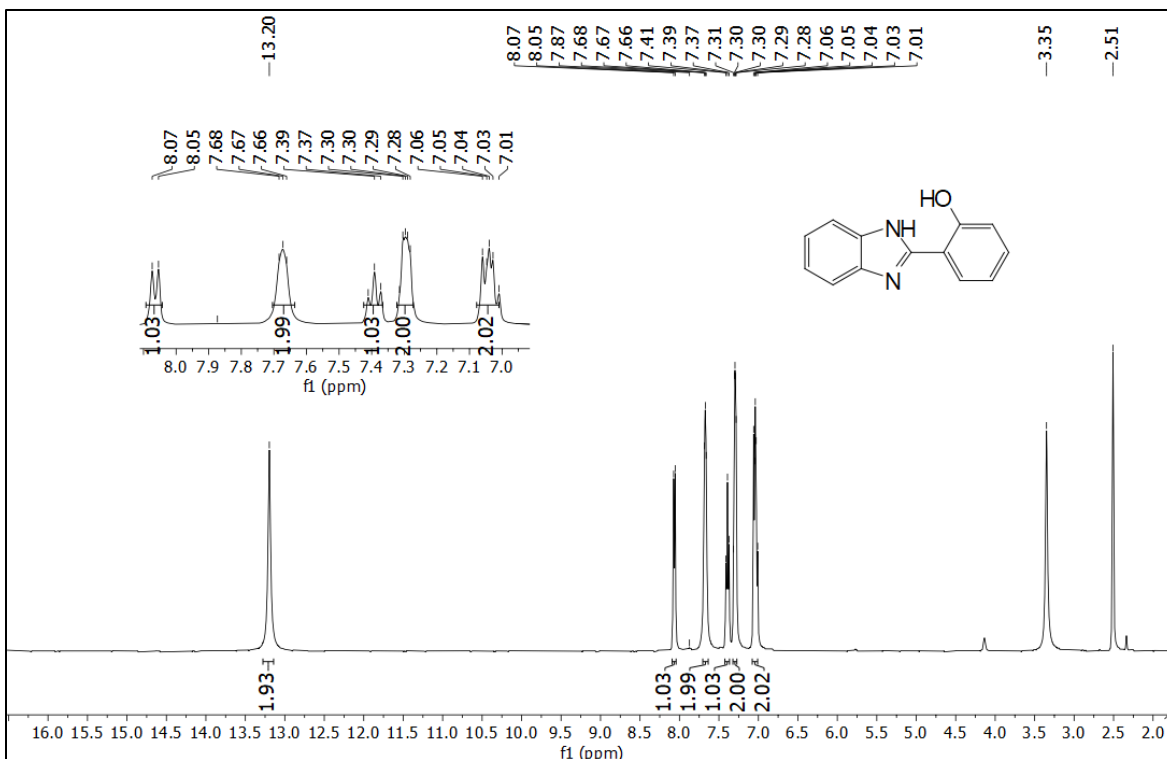

Figure 14S. The <sup>1</sup>H NMR spectrum

**2-(P-tolyl)-1H-benzimidazole (4h)**; White solid; M.P.: 260-262 °C (lit. m.p.: 260-261 °C) (37); IR (KBr,  $\nu$ ,  $\text{cm}^{-1}$ ): 3435, 1622, 1498, 1436, 3057, 2920, 1273; <sup>1</sup>H NMR (400 MHz, DMSO-*d*<sub>6</sub>)  $\delta$  (ppm): 2.38 (s, 3H, Me) 7.18 (dd,  $J = 6.2$  Hz, 3.1 Hz, 2H, Ar), 7.34 (d,  $J = 7.9$  Hz, 2H, Ar), 7.57 (s, 2H, Ar), 8.06 (d,  $J = 7.9$  Hz, 2H, Ar), 12.81 (s, 1H, N-H).

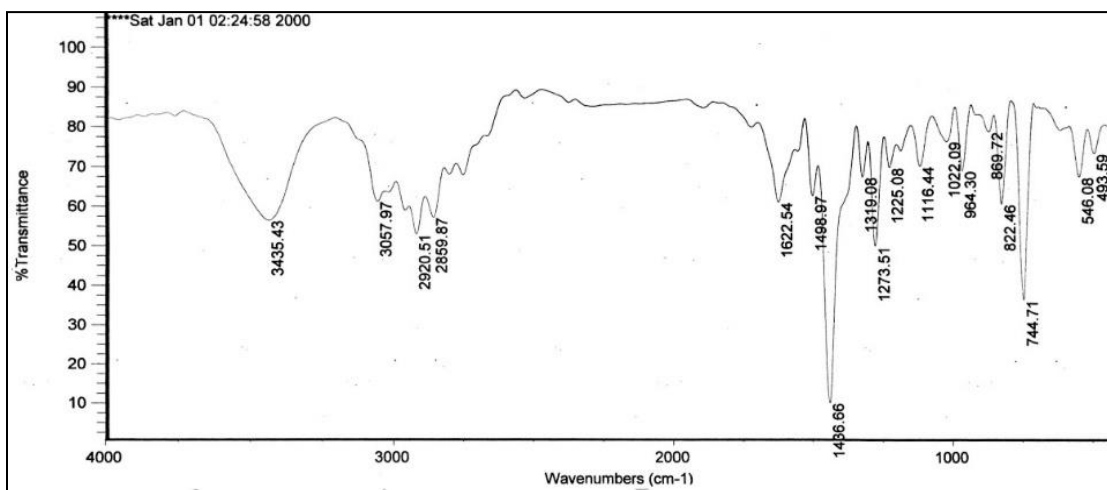

Figure 15S. The FT-IR spectrum

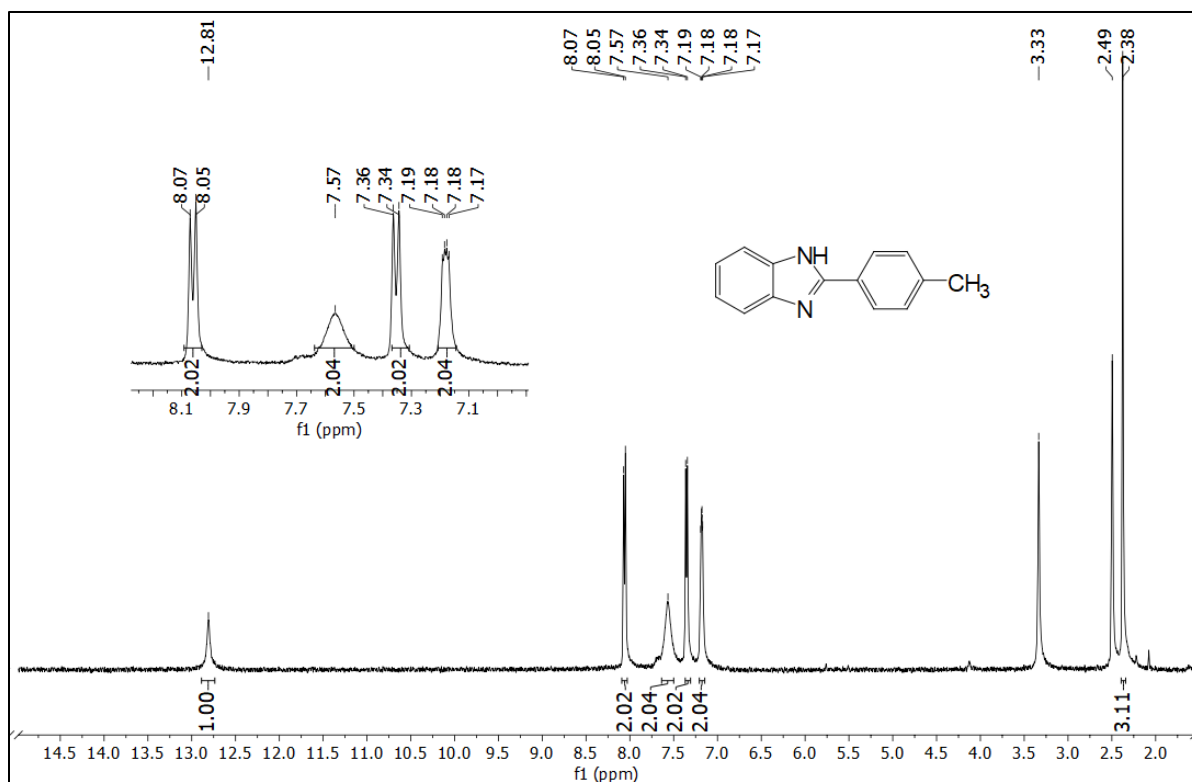

Figure 16S. The  $^1\text{H}$  NMR spectrum

**2-(4-Methoxyphenyl)-1H-benzimidazole (4i)** Yellow solid; M.P.: 228-230 °C (lit. m.p.: 245-247 °C); IR (KBr,  $\nu$ ,  $\text{cm}^{-1}$ ): 3442, 1628, 1527, 1477, 3072, 2858, 1235;  $^1\text{H}$  NMR (400 MHz,  $\text{DMSO}-d_6$ )  $\delta$  (ppm): 3.79 (s, 3H, OMe), 7.05-7.16 (m, 4H, Ar), 7.52 (s, 2H, Ar), 8.06-8.12 (m, 2H, Ar), 12.71 (s, 1H, NH).

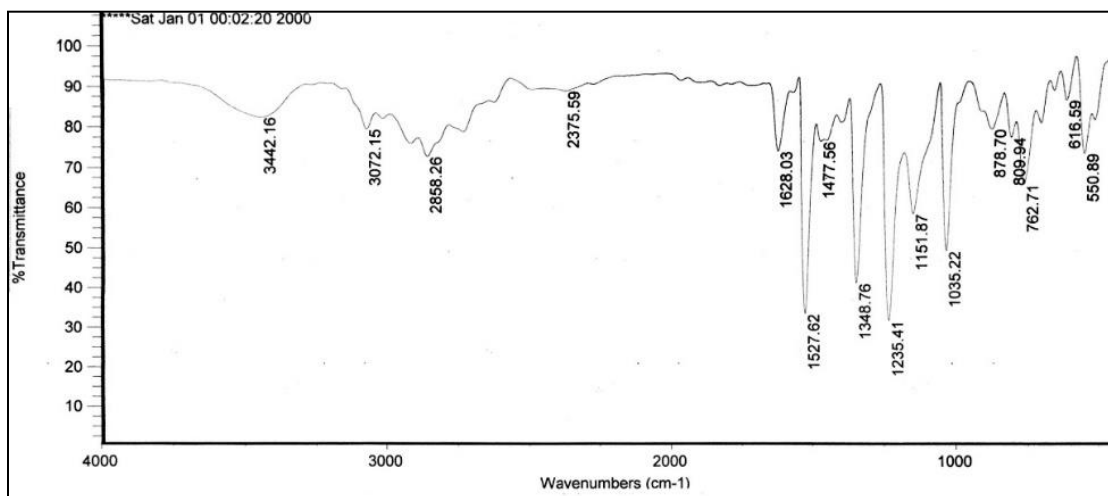

Figure 17S. The FT-IR spectrum

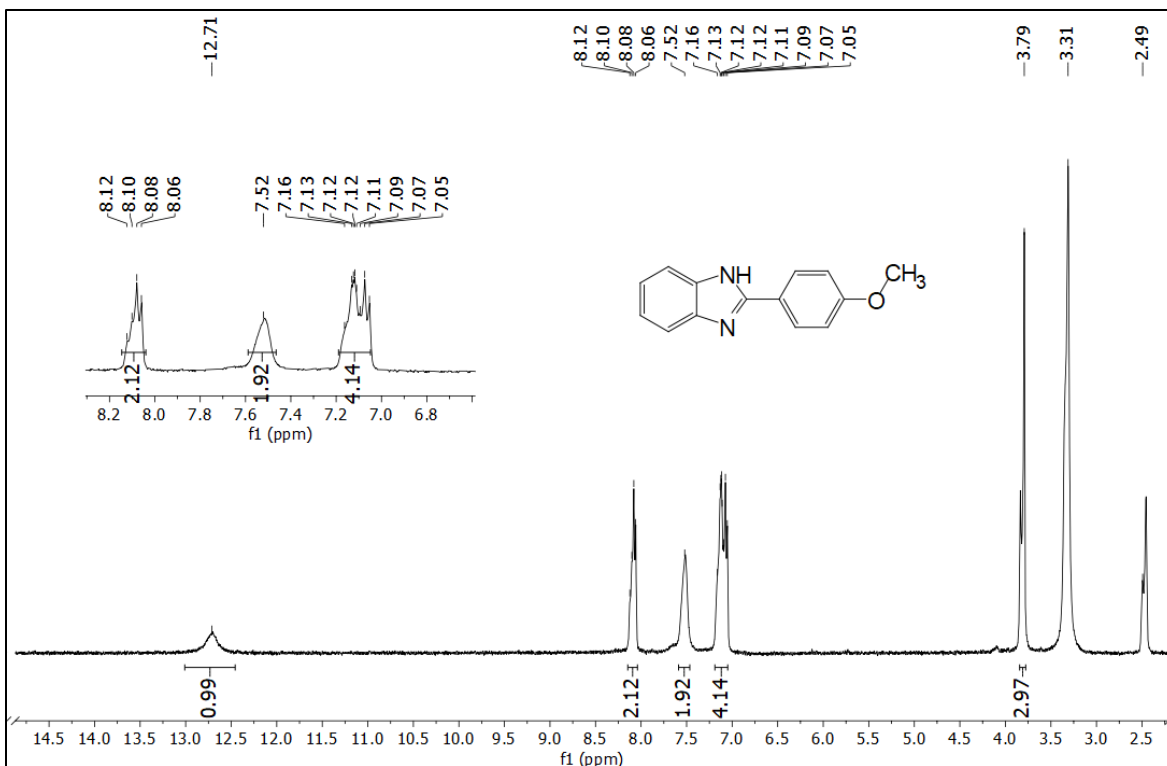

Figure 18S. The <sup>1</sup>H NMR spectrum

**2-(5-Bromo-2-hydroxyphenyl)-1H-benzimidazole (4j)**; White solid; M.P.: 250-253 °C (lit. m.p.: 258-261 °C); IR (KBr,  $\nu$ ,  $\text{cm}^{-1}$ ): 3335, 1582, 1485, 1381, 3054, 2925, 1254; <sup>1</sup>H NMR (400 MHz, DMSO-*d*<sub>6</sub>)  $\delta$  (ppm): 7.02 (d,  $J$  = 8.8 Hz, 1H, Ar), 7.29-7.31 (m, 2H, Ar), 7.52 (dd,  $J$  = 8.7, 2.5 Hz, 1H, Ar), 7.64-7.71 (m, 2H, Ar), 8.29 (d,  $J$  = 2.4 Hz, 1H, Ar), 13.30 (s, 1H, O-H), 13.30 (s, 1H, N-H).

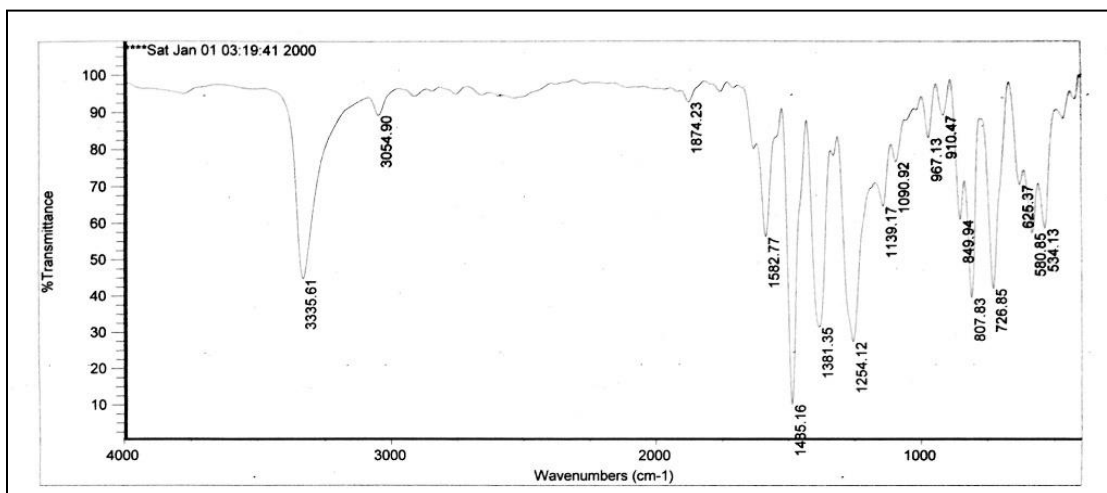

Figure 19S. The FT-IR spectrum

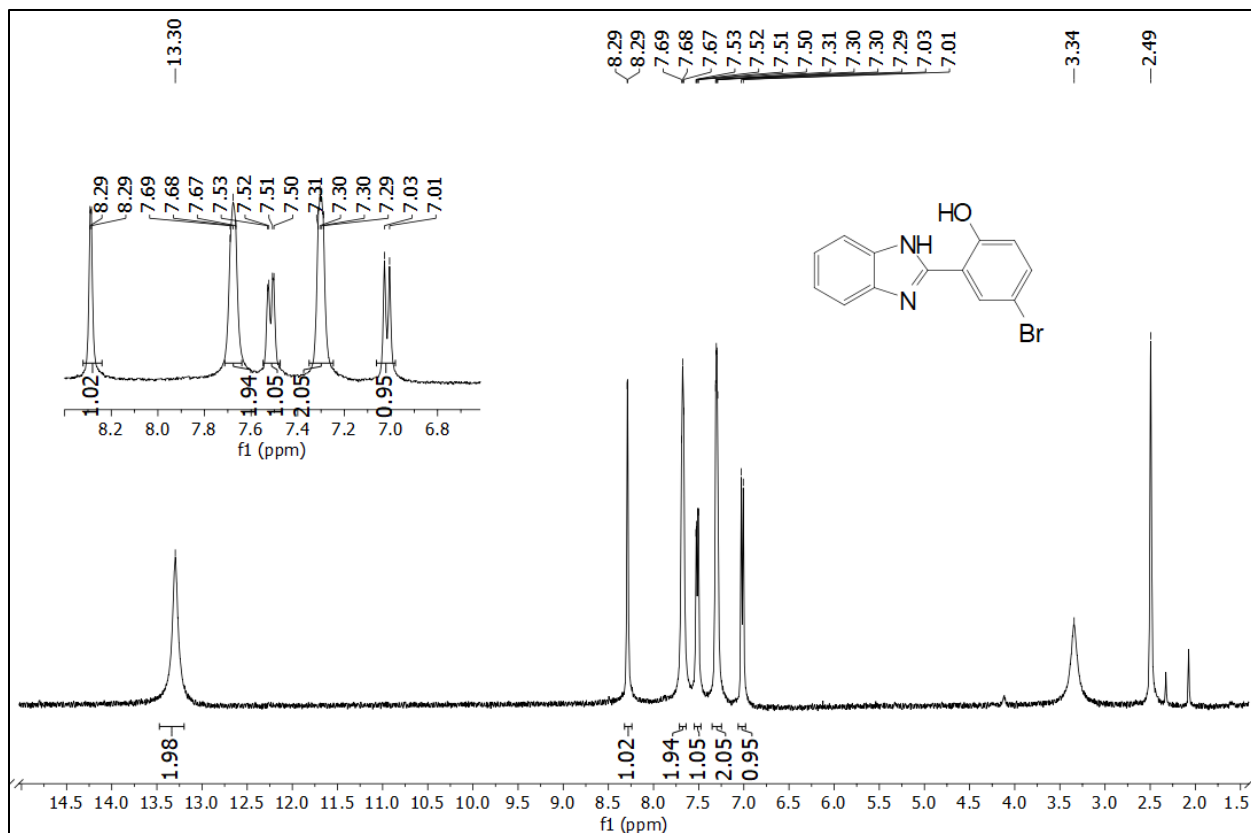

Figure 20S. The <sup>1</sup>H NMR spectrum

**2-(3-Chlorophenyl)-1H-benzimidazole (4k)**; Yellow solid; M.P.: 232-234 °C (lit. m.p.: 235-237 °C); IR (KBr,  $\nu$ ,  $\text{cm}^{-1}$ ): 3432, 1622, 1559, 1458, 3005, 1361; <sup>1</sup>H NMR (400 MHz, DMSO-*d*<sub>6</sub>)  $\delta$  (ppm): 7.21 (s, 2H, Ar), 7.56 (s, 4H, Ar), 8.17 (d,  $J = 32.7$  Hz, 2H, Ar), 13.03 (s, 1H, N-H).

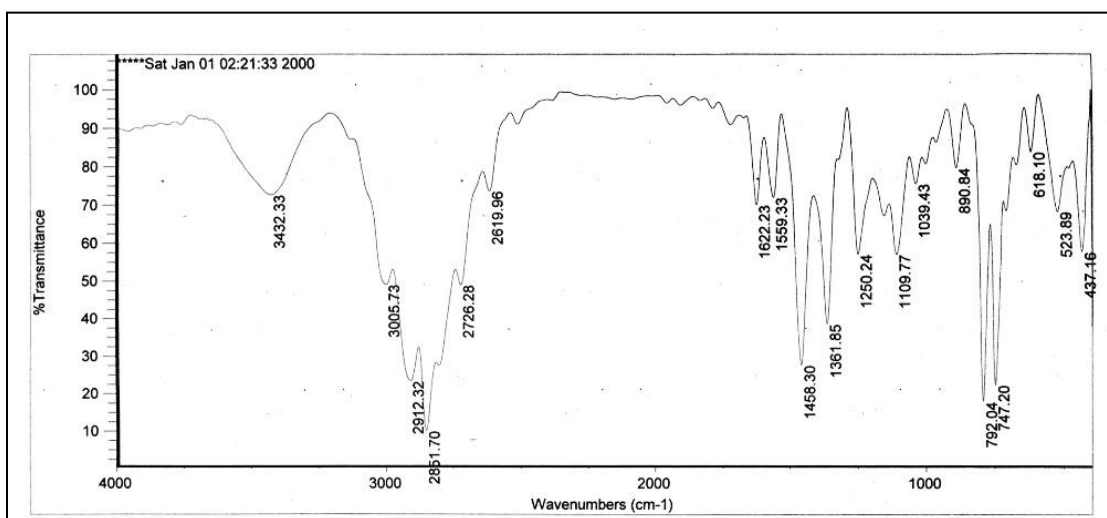

Figure 21S. The FT-IR spectrum

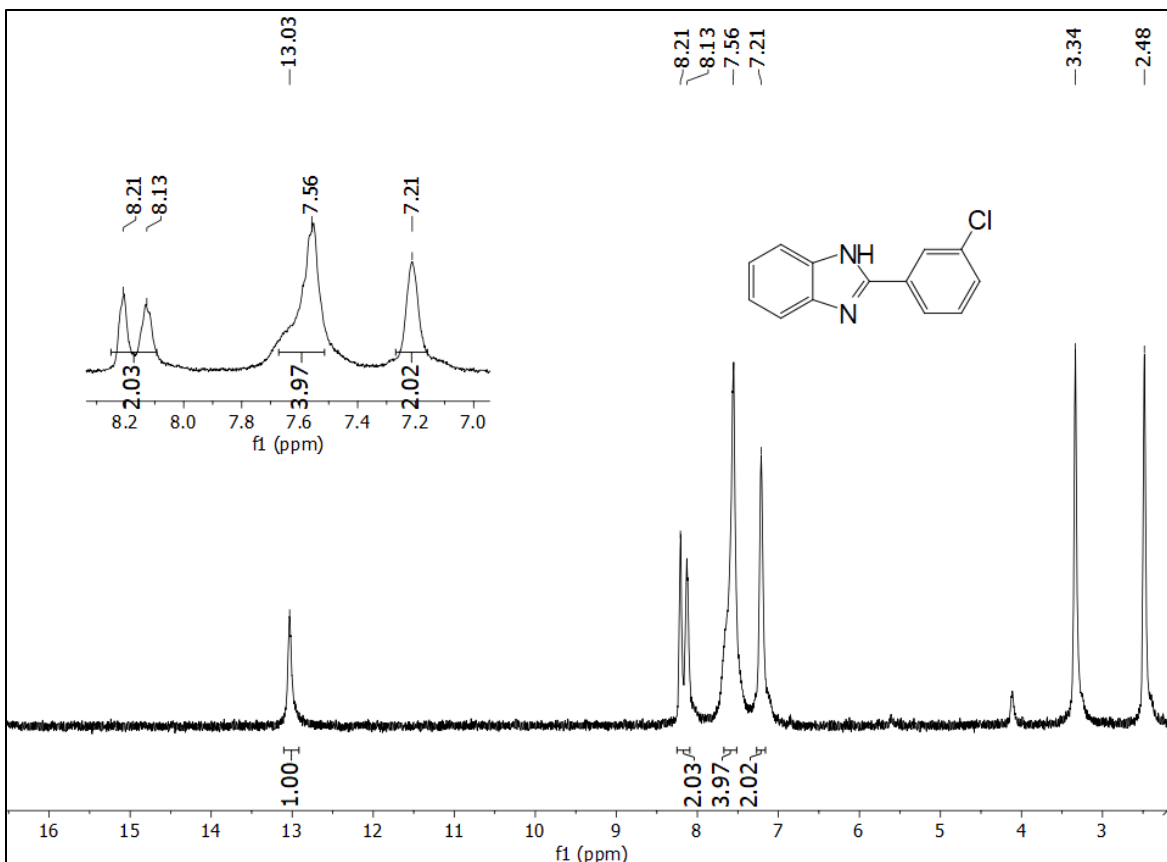

Figure 22S. The  $^1\text{H}$  NMR spectrum

**2-(4-Bromo-phenyl)-benzimidazole (4I)**; White solid; M.P.: 292-295 °C (lit. m.p.: 297-299 °C) (37); IR (KBr,  $\nu$ ,  $\text{cm}^{-1}$ ): 3450, 1594, 1430, 3055, 1318;  $^1\text{H}$  NMR (400 MHz,  $\text{DMSO-}d_6$ )  $\delta$  (ppm): 7.20-7.24 (m, 2H, Ar), 7.61 (s, 2H, Ar), 7.77 (d,  $J = 8.3$  Hz, 2H, Ar), 8.12 (d,  $J = 8.4$  Hz, 2H, Ar), 13.0 (s, 1H, N-H).

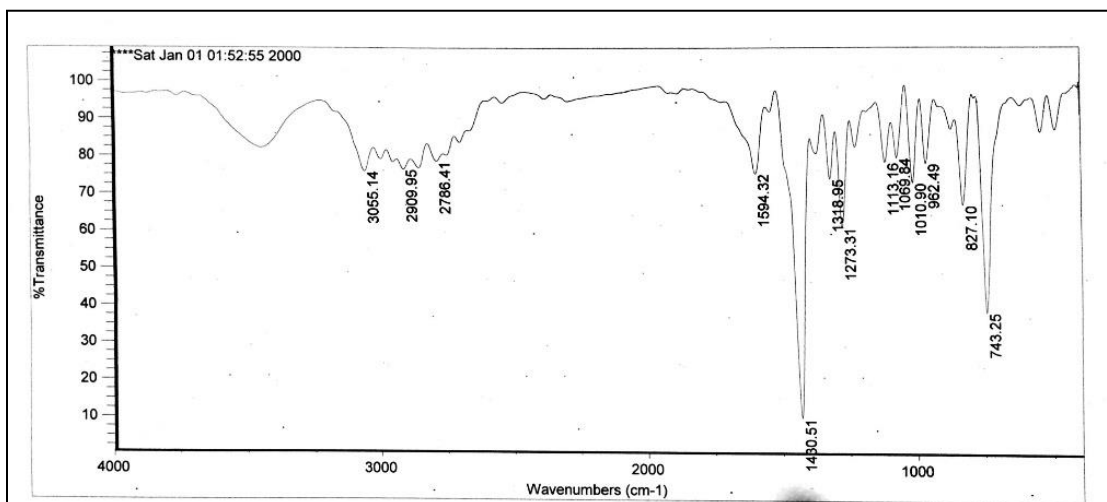

Figure 23S. The FT-IR spectrum

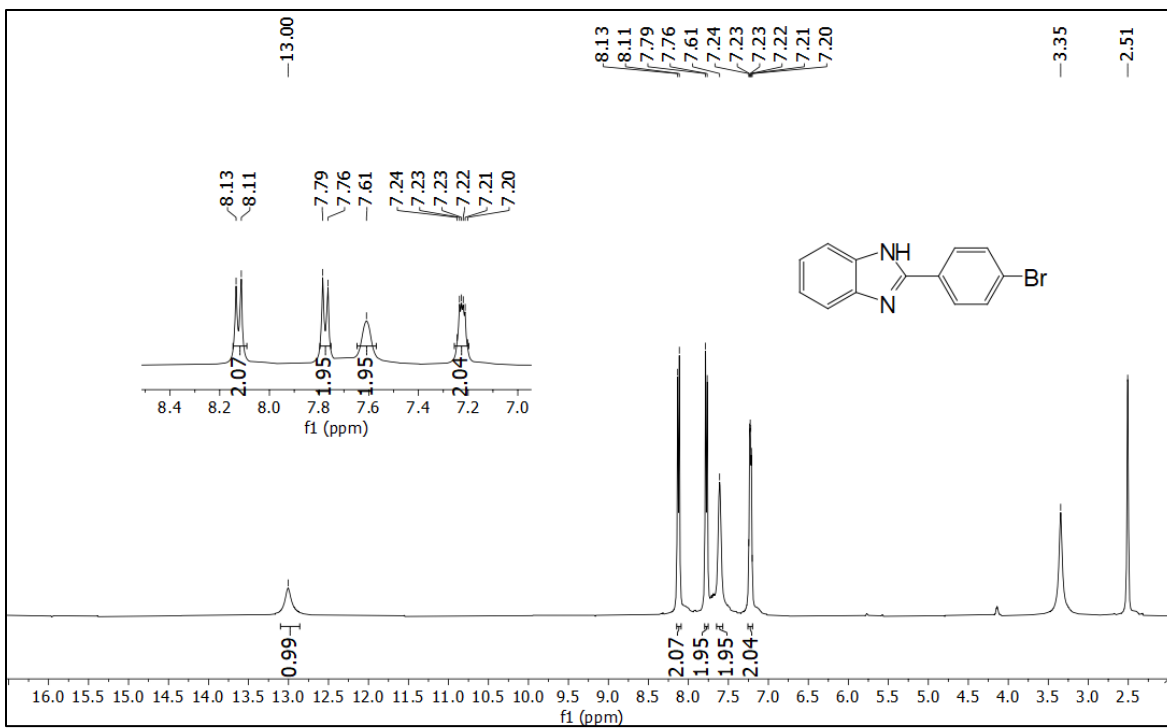

Figure 24S. The  $^1\text{H}$  NMR spectrum
